# Supplementary material
Source: Elsevier journal article supplement (https://www.sciencedirect.com/science/article/pii/S0213911115000710)
Supplement: mmc1 [file S0213911115000710:mmc1.docx]

**Apéndice. Material suplementario**

**Análisis estratificado por sexo**

**Tabla I**

Asociación entre las características individuales del usuario y su responsabilidad de causar el accidente (colisiones en que el peatón es varón)

| **Variable** | **Categorías** | **n** | **ORc (IC2,5%, IC97,5%)** | **ORaa (IC2,5%, IC97,5%)** |
| --- | --- | --- | --- | --- |
| *Peatón* |  |  |  |  |
|  |  |  |  |
| Edad (años) | <10 | 65 | 0,62 (0,19-2,06) | 1,36 (0,30-6,21) |
|  | 10-19 | 28 | 2,20 (0,63-7,70) | 4,75 (0,95-23,86) |
|  | 20-29 | 25 | 1,60 (0,43-5,89) | 3,29 (0,59-18,22) |
|  | 30-39 | 22 | 1 (Referencia) | 1 (Referencia) |
|  | 40-49 | 43 | 1,82 (0,56-5,91) | 3,40 (0,75-15,41) |
|  | 50-64 | 85 | 1,34 (0,44-4,03) | 3,12 (0,76-12,79) |
|  | 65-79 | 113 | 2,42 (0,83-7,02) | 4,81 (1,21-19,12) |
|  | >79 | 45 | 1,54 (0,47-5,00) | 3,54 (0,80-15,77) |
|  |  |  |  |  |
| *Ciclista*b |  |  |  |  |
|  |  |  |  |
| Edad (años) | <14 | 50 | 1,35 (0,63-2,94) | 3,13 (1,19-7,69) |
|  | 15-24 | 192 | 1,28 (0,75-2,17) | 2,50 (1,20-5,26) |
|  | 25-34 | 87 | 1 (Referencia) | 1 (Referencia) |
|  | 35-44 | 50 | 1,02 (0,49-2,13) | 1,85 (0,68-5,00) |
|  | 45-54 | 22 | 0,44 (0,17-1,14) | 0,71 (0,21-2,44) |
|  | 55-64 | 8 | 0,53 (0,12-2,27) | 0,72 (0,10-5,26) |
|  | >64 | 10 | 1,23 (0,30-5,00) | 0,57 (0,09-3,70) |
|  |  |  |  |  |
| Sexo | Hombre | 397 | 1 (Referencia) | 1 (Referencia) |
|  | Mujer | 52 | 1,75 (0,89-3,45) | 1,69 (0,65-4,55) |
|  |  |  |  |  |
| Uso de casco | No | 265 | 1 (Referencia) | 1 (Referencia) |
|  | Sí | 57 | 0,45 (0,25-0,80) | 0,38 (0,17-0,87) |
|  | Desconocido | 131 | 0,92 (0,58-1,43) | 0,49 (0,26-0,93) |

IC: intervalo de confianza; Ora: *odds ratio* ajustada; ORc: *odds ratio* cruda.

aEl número de sujetos considerado en el modelo multivariado fue de 362 (tras la exclusión de los casos con datos faltantes para las variables edad y sexo, y de aquellos subgrupos de casos que impedían la convergencia del modelo).

bOR calculadas invirtiendo el valor de las estimaciones obtenidas para peatones en el modelo de regresión logística.

**Tabla II**

Asociación entre las características individuales del usuario y su responsabilidad de causar el accidente (colisiones en las que el peatón es mujer)

| **Variable** | **Categorías** | **n** | **ORc (IC2,5%, IC97,5%)** | **ORaa (IC2,5%, IC97,5%)** |
| --- | --- | --- | --- | --- |
| *Peatón* |  |  |  |  |
|  |  |  |  |
| Edad (años) | <10 | 49 | 0,65 (0,25-1,68) | 0,43 (0,13-1,41) |
|  | 10-19 | 24 | 3,00 (1,07-8,39) | 3,11 (0,78-12,34) |
|  | 20-29 | 46 | 1,63 (0,68-3,91) | 1,25 (0,43-3,64) |
|  | 30-39 | 46 | 1 (Referencia) | 1 (Referencia) |
|  | 40-49 | 88 | 0,80 (0,35-1,78) | 0,72 (0,26-1,96) |
|  | 50-64 | 169 | 0,71 (0,34-1,49) | 0,87 (0,35-2,19) |
|  | 65-79 | 170 | 1,15 (0,56-2,36) | 1,29 (0,52-3,20) |
|  | >79 | 85 | 1,25 (0,57-2,73) | 1,48 (0,56-3,95) |
|  |  |  |  |  |
| *Ciclista*b |  |  |  |  |
|  |  |  |  |
| Edad (años) | <14 | 101 | 2,86 (1,54-5,56) | 8,33 (3,57-16,67) |
|  | 15-24 | 282 | 1,01 (0,66-1,54) | 1,96 (1,10-3,45) |
|  | 25-34 | 136 | 1 (Referencia) | 1 (Referencia) |
|  | 35-44 | 89 | 1,25 (0,70-2,22) | 1,25 (0,59-2,63) |
|  | 45-54 | 32 | 2,38 (0,91-6,25) | 1,59 (0,47-5,26) |
|  | 55-64 | 19 | 4,55 (1,03-20,00) | 20,00 (2,13-100,00) |
|  | >64 | 10 | 2,17 (0,44-11,11) | 8,33 (0,82-100,00) |
|  |  |  |  |  |
| Sexo | Hombre | 613 | 1 (Referencia) | 1 (Referencia) |
|  | Mujer | 79 | 1,30 (0,76-2,22) | 1,67 (0,85-3,33) |
|  |  |  |  |  |
| Uso de casco | No | 426 | 1 (Referencia) | 1 (Referencia) |
|  | Sí | 83 | 0,85 (0,52-1,41) | 0,44 (0,21-0,93) |
|  | Desconocido | 197 | 0,98 (0,68-1,43) | 0,58 (0,34-0,99) |

IC: intervalo de confianza; Ora: *odds ratio* ajustada; ORc: *odds ratio* cruda.

aEl número de sujetos considerado en el modelo multivariado fue de 580 (tras la exclusión de los casos con datos faltantes para las variables edad y sexo, y de aquellos subgrupos de casos que impedían la convergencia del modelo).

bOR calculadas invirtiendo el valor de las estimaciones obtenidas para peatones en el modelo de regresión logística.

**Tabla III**

Asociación entre las características individuales del usuario y su responsabilidad de causar el accidente (colisiones en las que el ciclista es varón)

| **Variable** | **Categorías** | **n** | **ORc (IC2,5%, IC97,5%)** | **ORaa (IC2,5%, IC97,5%)** |
| --- | --- | --- | --- | --- |
| *Peatón* |  |  |  |  |
|  |  |  |  |
| Edad (años) | <10 | 94 | 0,60 (0,27-1,33) | 0,70 (0,27-1,77) |
|  | 10-19 | 44 | 2,93 (1,28-6,74) | 3,09 (1,14-8,40) |
|  | 20-29 | 65 | 1,72 (0,79-3,72) | 2,00 (0,80-4,95) |
|  | 30-39 | 59 | 1 (Referencia) | 1 (Referencia) |
|  | 40-49 | 111 | 1,24 (0,61-2,53) | 1,57 (0,68-3,63) |
|  | 50-64 | 226 | 1,04 (0,54-2,00) | 1,52 (0,70-3,29) |
|  | 65-79 | 248 | 1,61 (0,85-3,06) | 2,05 (0,96-4,38) |
|  | >79 | 116 | 1,60 (0,80-3,23) | 2,34 (1,02-5,32) |
|  |  |  |  |  |
| Sexo | Hombre | 397 | 1 (Referencia) | 1 (Referencia) |
|  | Mujer | 613 | 0,84 (0,64-1,10) | 0,92 (0,66-1,29) |
| *Ciclista*b |  |  |  |  |
|  |  |  |  |
| Edad (años) | <14 | 139 | 2,33 (1,41-3,85) | 5,00 (2,78-9,09) |
|  | 15-24 | 418 | 1,18 (0,83-1,69) | 2,13 (1,35-3,33) |
|  | 25-34 | 197 | 1 (Referencia) | 1 (Referencia) |
|  | 35-44 | 124 | 1,11 (0,69-1,79) | 1,22 (0,67-2,22) |
|  | 45-54 | 52 | 1,11 (0,58-2,13) | 0,85 (0,36-1,96) |
|  | 55-64 | 25 | 1,85 (0,71-5,00) | 4,00 (1,16-14,29) |
|  | >64 | 17 | 1,41 (0,48-4,17) | 1,69 (0,43-6,67) |
|  |  |  |  |  |
|  |  |  |  |  |
| Uso de casco | No | 618 | 1 (Referencia) | 1 (Referencia) |
|  | Sí | 131 | 0,68 (0,46-1,00) | 0,46 (0,27-0,78) |
|  | Desconocido | 272 | 0,93 (0,68-1,27) | 0,55 (0,36-0,83) |

IC: intervalo de confianza; Ora: *odds ratio* ajustada; ORc: *odds ratio* cruda.

aEl número de sujetos considerado en el modelo multivariado fue de 838 (tras la exclusión de los casos con datos faltantes para las variables edad y sexo, y de aquellos subgrupos de casos que impedían la convergencia del modelo).

bOR calculadas invirtiendo el valor de las estimaciones obtenidas para peatones en el modelo de regresión logística.
